# Supplementary material
Source: publisher figshare collection journal article supplement (https://sage.figshare.com/ndownloader/files/16861601)
Supplement: Supplementary file 1 [file 16861601]

Supplemental Table A1. Variable definitions

| Variable                  | Definition                                                                                                                                                                                                                                                                                                                                           |
|---------------------------|------------------------------------------------------------------------------------------------------------------------------------------------------------------------------------------------------------------------------------------------------------------------------------------------------------------------------------------------------|
| ln(Yearly earnings)       | = logarithm of annual earnings from labor.                                                                                                                                                                                                                                                                                                           |
| ln(Monthly earnings)      | = logarithm of monthly earnings from labor. The measure is constructed by the use of an employer-employee register (RAMS). It is conditional on employment in November; an individual's primary employer is identified, and the monthly income is given by dividing the total income from the main employer over the length of the employment spell. |
| ln(Wage)                  | = Full-time monthly wages covering all public sector employees and around fifty percent of private sector employees. The sample is stratified by firm size so that small firms are underrepresented.                                                                                                                                                 |
| Employment                | = 1 if an individual is employed in November.                                                                                                                                                                                                                                                                                                        |
| Sex                       | = 1 if male, 0 if female.                                                                                                                                                                                                                                                                                                                            |
| Civil status              | = 1 if married.                                                                                                                                                                                                                                                                                                                                      |
| Children in household     | = 1 if child under the age of 18 is present in the household.                                                                                                                                                                                                                                                                                        |
| Region of birth           | = 1 if born outside Sweden.                                                                                                                                                                                                                                                                                                                          |
| Age                       | Years of age.                                                                                                                                                                                                                                                                                                                                        |
| Municipality of residence | A vector of region dummies.                                                                                                                                                                                                                                                                                                                          |
| Educational attainment    | A vector of educational dummies, 0=High school, 1=High school and 2=College.                                                                                                                                                                                                                                                                         |

Supplemental Table A2. Characteristics of the permanent EU8 population in 2008

| Characteristics and outcomes                             | Pre-<br>Enlargement<br>immigrants | Post-<br>Enlargement<br>immigrants |
|----------------------------------------------------------|-----------------------------------|------------------------------------|
| Age                                                      | 45.52                             | 33.99                              |
| Sex (1=man)                                              | 0.36                              | 0.53                               |
| Married                                                  | 0.45                              | 0.48                               |
| Children under 18 in household                           | 0.32                              | 0.38                               |
| No high school                                           | 0.16                              | 0.42                               |
| High school                                              | 0.49                              | 0.28                               |
| College                                                  | 0.35                              | 0.30                               |
| Employed in Nov.                                         | 0.63                              | 0.46                               |
| Annual earnings (1000's of SEK)                          | 156.04                            | 92.98                              |
| Monthly earnings conditional on emp. in Nov.             | 19.95                             | 16.28                              |
| <i>N</i>                                                 | 16,701                            | 8,620                              |
| Industry (distribution conditional on empl. in November) |                                   |                                    |
| Not classified                                           | 1.59                              | 1.39                               |
| Agriculture, hunting, forestry, fishing                  | 0.85                              | 11.90                              |
| Mining and quarrying                                     | 0.03                              | 0.05                               |
| Manufacturing                                            | 15.99                             | 17.96                              |
| Electricity, gas and water supply                        | 0.32                              | 0.00                               |
| Construction                                             | 3.67                              | 19.17                              |
| Wholesale and retail trade                               | 11.51                             | 10.51                              |
| Hotels and restaurants                                   | 3.35                              | 4.36                               |
| Transport, storage and communication                     | 6.02                              | 4.05                               |
| Financial intermediation                                 | 0.71                              | 0.10                               |
| Business services (incl real estate and renting)         | 12.91                             | 17.02                              |
| Public administration                                    | 3.97                              | 0.20                               |
| Education                                                | 9.89                              | 2.08                               |
| Health and social work                                   | 25.25                             | 8.89                               |

|                                                         |      |      |
|---------------------------------------------------------|------|------|
| Other community, social and personal service activities | 3.92 | 2.30 |
| Activities of households                                | 0.00 | 0.00 |
| Extra-territorial organizations and bodies              | 0.02 | 0.00 |
| <i>N</i>                                                | 100  | 100  |

Notes: Population aged 16-64 years in Södra Götaland old born in new member states observed in 2008.

Supplemental Table A3. Characteristics of the temporary immigrant work force

|                                                            | 2000  | 2001  | 2002  | 2003  | 2004  | 2005  | 2006  | 2007  | 2008  |
|------------------------------------------------------------|-------|-------|-------|-------|-------|-------|-------|-------|-------|
| Age                                                        | 32.43 | 32.64 | 31.06 | 30.36 | 29.66 | 29.01 | 28.19 | 28.58 | 28.49 |
| Male                                                       | 0.64  | 0.64  | 0.62  | 0.62  | 0.62  | 0.70  | 0.70  | 0.70  | 0.69  |
| Earnings main employer<br>(1000's SEK)                     | 22.31 | 24.47 | 25.12 | 27.54 | 28.94 | 43.31 | 47.05 | 56.04 | 59.86 |
| Total earnings                                             | 22.99 | 25.33 | 25.93 | 28.35 | 29.76 | 43.94 | 47.69 | 56.60 | 60.49 |
| <i>N</i>                                                   | 2,313 | 2,445 | 2,951 | 3,195 | 3,544 | 3,393 | 3,975 | 4,487 | 5,680 |
| Distribution across industries                             |       |       |       |       |       |       |       |       |       |
| Not classified                                             | 1.73  | 1.64  | 2.17  | 1.03  | 0.79  | 0.24  | 0.33  | 0.71  | 2.71  |
| Agriculture, hunting, forestry,<br>fishing                 | 87.33 | 89.24 | 89.05 | 92.27 | 87.98 | 79.81 | 74.42 | 69.04 | 68.01 |
| Mining and quarrying                                       | 0.00  | 0.12  | 0.20  | 0.06  | 0.40  | 0.56  | 0.33  | 0.27  | 0.55  |
| Manufacturing                                              | 1.21  | 1.27  | 2.07  | 1.06  | 2.12  | 6.07  | 6.21  | 5.26  | 7.57  |
| Electricity, gas and water supply                          | 0.00  | 0.00  | 0.07  | 0.03  | 0.03  | 0.00  | 0.00  | 0.00  | 0.00  |
| Construction                                               | 0.61  | 0.41  | 0.51  | 0.31  | 0.68  | 2.92  | 4.30  | 6.75  | 4.75  |
| Wholesale and retail trade                                 | 1.25  | 2.17  | 1.97  | 1.85  | 2.88  | 3.80  | 6.94  | 9.58  | 8.49  |
| Hotels and restaurants                                     | 0.00  | 0.00  | 0.00  | 0.00  | 0.40  | 1.00  | 0.93  | 0.69  | 0.86  |
| Transport, storage and<br>communication                    | 1.25  | 0.78  | 0.10  | 0.09  | 0.08  | 0.32  | 0.30  | 1.85  | 1.06  |
| Financial intermediation                                   | 0.00  | 0.00  | 0.00  | 0.00  | 0.00  | 0.09  | 0.10  | 0.13  | 0.05  |
| Business services (incl. real<br>estate and renting)       | 0.35  | 0.45  | 0.71  | 1.19  | 1.95  | 3.42  | 4.35  | 3.81  | 4.38  |
| Public administration                                      | 0.00  | 0.00  | 0.00  | 0.00  | 0.00  | 0.00  | 0.00  | 0.16  | 0.00  |
| Education                                                  | 0.17  | 0.12  | 0.07  | 0.06  | 0.06  | 0.24  | 0.28  | 0.40  | 0.07  |
| Health and social work                                     | 0.17  | 0.16  | 0.07  | 0.25  | 0.28  | 0.24  | 0.63  | 0.42  | 0.28  |
| Other community, social and<br>personal service activities | 5.92  | 3.64  | 3.02  | 1.78  | 2.37  | 1.30  | 0.88  | 0.91  | 1.21  |
| Total                                                      | 100   | 100   | 100   | 100   | 100   | 100   | 100   | 100   | 100   |

Notes: Sample used is the total population of temporary workers from new member states observed in southern Sweden, 2000–2008. Observe that for this population we do not have information on country of birth. Instead, we use nationality.

Supplemental Table A4. Placebo analysis – baseline specification

|                                                                  | < 50 km from ferry * post-enlargement |          |         |          |
|------------------------------------------------------------------|---------------------------------------|----------|---------|----------|
|                                                                  | (i)                                   | (ii)     | (iii)   | (iv)     |
| Employment                                                       | 0.000                                 | 0.007*** | 0.006** | 0.008**  |
|                                                                  | (0.002)                               | (0.002)  | (0.002) | (0.001)  |
| (log) Annual earnings (cond. on earnings>0)                      | 0.006                                 | 0.006    | 0.006   | 0.017*** |
|                                                                  | (0.008)                               | (0.008)  | (0.005) | (0.002)  |
| (log) Monthly earnings main employer (cond. on employed in Nov.) | 0.006                                 | 0.003    | 0.005   | 0.011*** |
|                                                                  | (0.007)                               | (0.004)  | (0.004) | (0.002)  |
| No trend                                                         | X                                     |          |         |          |
| Linear trends                                                    |                                       | X        |         |          |
| Quadratic trends                                                 |                                       |          | X       | X        |
| Covariates                                                       | X                                     | X        | X       | X        |
| Municipality FE                                                  | X                                     | X        | X       | X        |
| Year FE                                                          | X                                     | X        | X       | X        |
| Individual fixed effects                                         |                                       |          |         | X        |

Notes: Robust standard errors clustered on municipalities within parentheses. Treatment is defined as residing at most 50 km from a harbor measured by airplane interacted with time. Sample includes population aged 16-64 and born in Sweden or elsewhere, excluding individuals born in new member states. Covariates include age, age squared, educational attainment, civil status, children in household, sex, and region of birth (native/foreign-born). Treatment moved back to 1998, data from 1994-2002 are used. Sample size for employment (annual earnings) [monthly earnings] is 10,713,058 (8,527,583) [7,749,550].

\* <0.05 \*\* <0.01 \*\*\* <0.001
